# Supplementary material
Source: publisher figshare collection journal article supplement (https://acs.figshare.com/ndownloader/files/4581949)
Supplement: Supplementary file 1 [file 4581949]

# Supporting Information for Publication

## Supplementary Figures and tables

Supplementary table 1

|                                            |                            |       |        |      |       |      |
|--------------------------------------------|----------------------------|-------|--------|------|-------|------|
| X-ray source                               | LMB Bruker                 |       |        |      |       |      |
| Wavelength $\lambda$ (Å)                   | 1.54179                    |       |        |      |       |      |
| Space group                                | P2 <sub>1</sub>            |       |        |      |       |      |
| Unit cell (a Å, b Å, c Å)                  | 60.75                      | 73.95 | 170.50 | 90.0 | 91.46 | 90.0 |
| Resolution shell (Å)                       | 50-2.07                    |       |        |      |       |      |
| Measurements                               | 3335855                    |       |        |      |       |      |
| Average I/ $\sigma$ I                      | 8.26                       |       |        | 0.75 |       |      |
| Unique reflections                         | 140066                     |       |        | 9539 |       |      |
| Completeness (%)                           | 76.8                       |       |        | 52.3 |       |      |
| $R_{\text{merge}}$ (%) <sup>§</sup>        | 10.6                       |       |        | 70.1 |       |      |
| $R_{\text{cryst}}$ (%) <sup>*</sup>        | 25.0                       |       |        |      |       |      |
| $R_{\text{free}}$ (%) <sup>†</sup>         | 26.8                       |       |        |      |       |      |
| RMS deviation <sup>¶</sup>                 | 0.019Å (1.88°)             |       |        |      |       |      |
| $B$ factors <sup>‡</sup> (Å <sup>2</sup> ) | 37.35, 38.43, 32.92, 36.33 |       |        |      |       |      |
| Residues                                   | 1540                       |       |        |      |       |      |
| Water molecules                            | 295                        |       |        |      |       |      |
| PDB code                                   | 2vzk                       |       |        |      |       |      |

$$^{\S} R_{\text{merge}} = \frac{\sum_j \sum_h |I_{h,j} - \langle I_h \rangle|}{\sum_j \sum_h \langle I_h \rangle} \times 100$$

$$^* R_{\text{cryst}} = \frac{\sum ||F_{\text{obs}}| - |F_{\text{calc}}||}{\sum |F_{\text{obs}}|} \times 100$$

<sup>†</sup>  $R_{\text{free}}$  = based on 5% of the total reflections.

<sup>¶</sup> RMS deviation from ideality for bonds (followed by the value for angles).

<sup>‡</sup> Average  $B$  factors in order: main chain, side chain, substrate and solvent.

Supplementary Figure 1

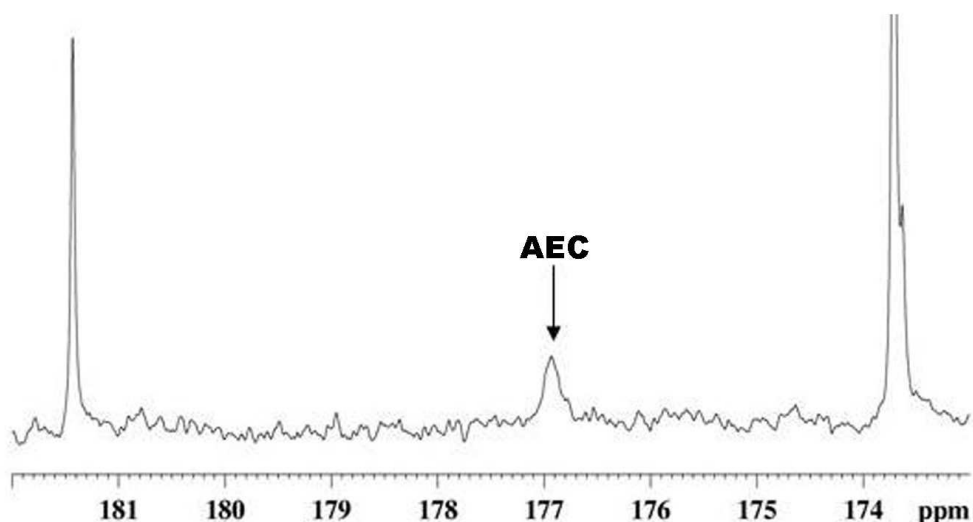

Supplementary Figure 2

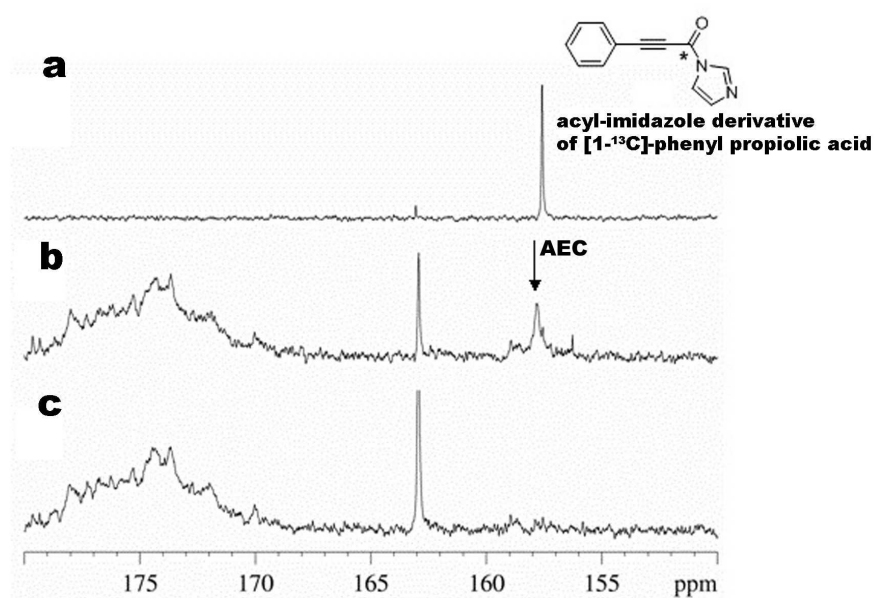

Supplementary Figure 3

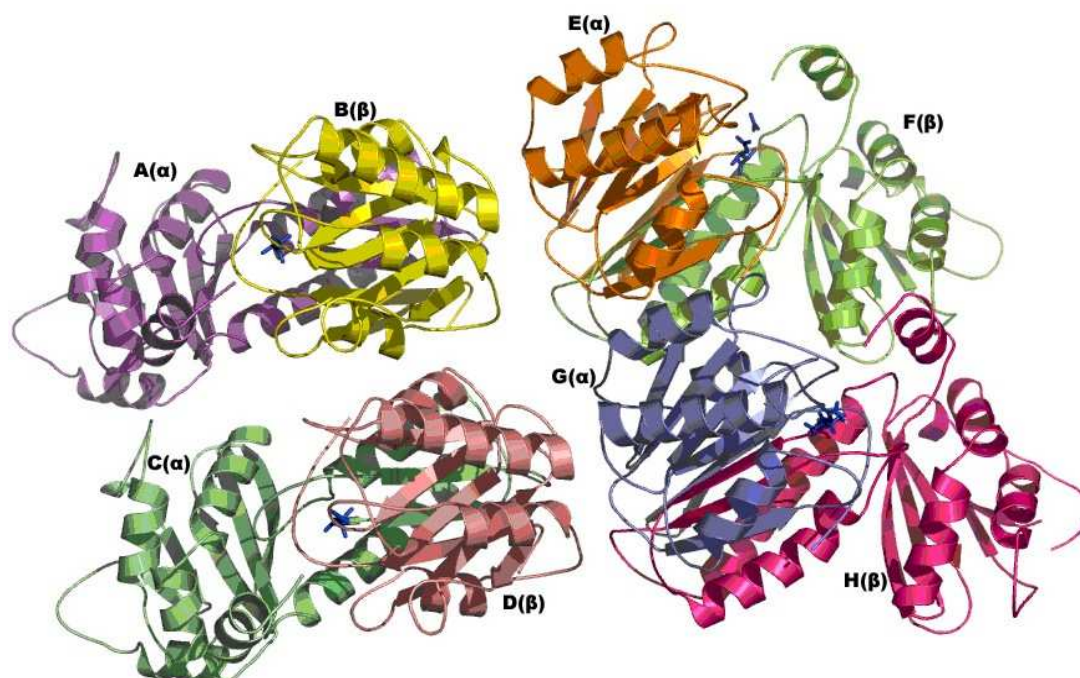

Supplementary Figure 4

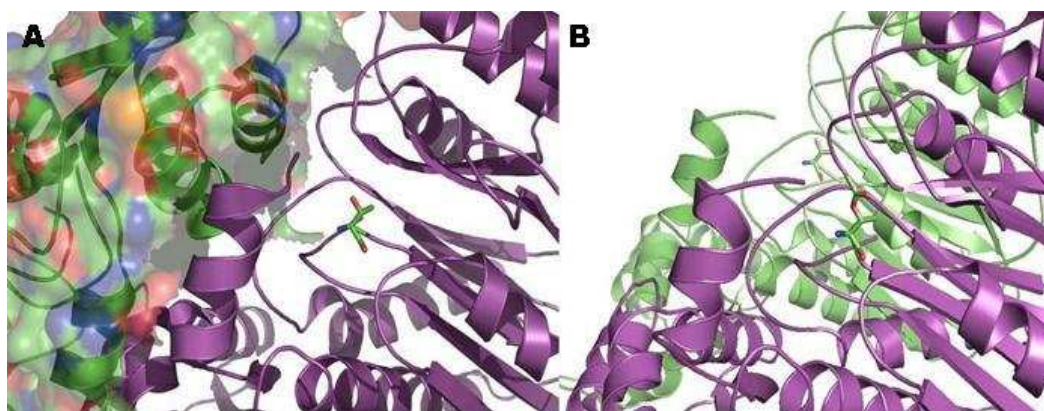

Supplementary Figure 5

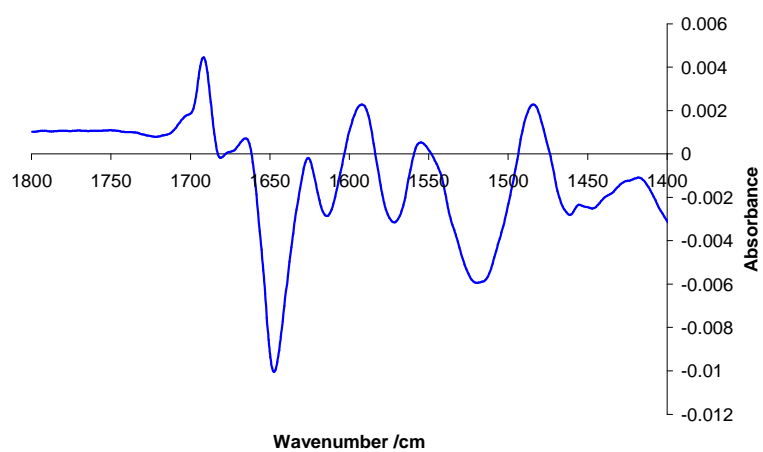

Supplementary Figure 6

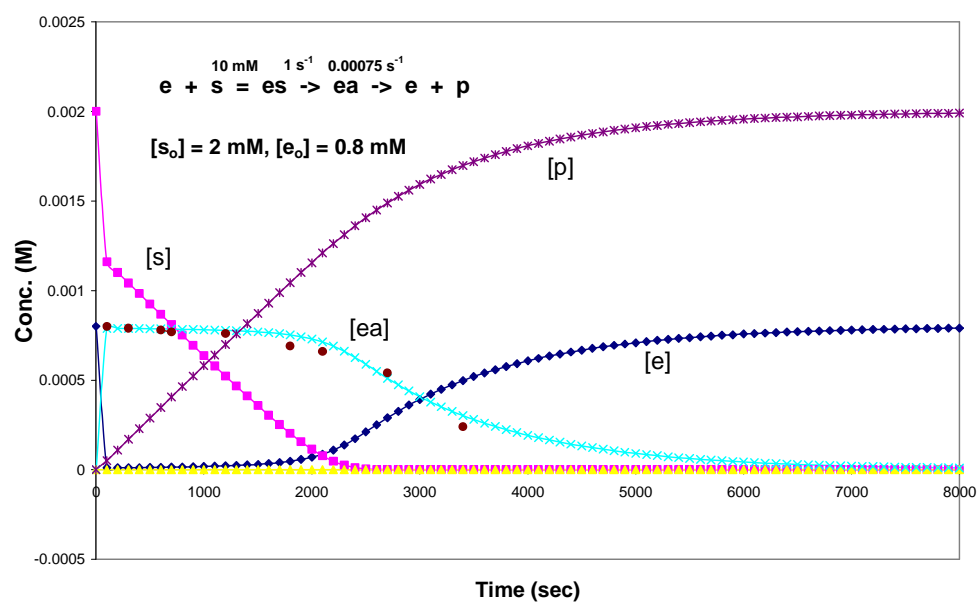

Supplementary Figure 7:

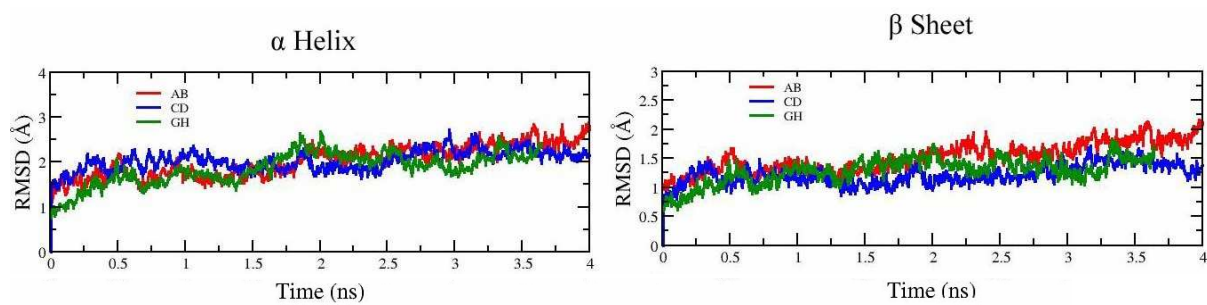

### **Supplementary figures and table legends:**

**Supp Table 1:** Data collection and statistics for the crystal structure of acyl-OAT2.

**Supp Figure 1:**  $^{13}\text{C}$  NMR spectra showing the assigned acyl-enzyme complex at 176.9 ppm (indicated by an arrow). The other resonances in the spectrum correspond to the substrate  $^{13}\text{C}$ - acyl-*N*- $\alpha$ -acetyl-L-glutamate resonance at 174.6 ppm, and product  $^{13}\text{C}$  acetate resonance at 181.4 ppm.

**Supp Figure 2:** NMR experiments with chymotrypsin. (a) Spectrum for the imidazole derivative of  $^{13}\text{C}$ -phenyl propiolic acid. (b) The reaction of chymotrypsin with  $^{13}\text{C}$ -phenyl propiolic acid at  $t = 0$ , and (c) after incubation of the reaction mixture for 10 min. The arrow indicates the resonance corresponding to the assigned chymotrypsin acyl-enzyme complex. The broad resonance between 170-180 ppm in (b) and (c) corresponds to protein background.

**Supp Figure 3:** View from the acyl-OAT2 crystal structure showing the four subunits/eight chains of OAT2 acyl-enzyme complex. The AB, CD, EF and GH molecules are shown in different colours corresponding to the eight different chains. Thr-181 is in blue sticks.

**Supp Figure 4:** Comparison of the unmodified OAT2 and acyl-OAT2 crystal structures showing the active site regions. (a) The entrance of the OAT2 active site is blocked by the C-terminal domain of a neighbouring molecule (shown in a surface view) in the unmodified OAT2 structure. (b) In the acyl-OAT2 structure the entrance to the active site is open to solvent. Thr-181 is in blue sticks.

**Supp Figure 5:** Difference ( $^{12}\text{C}=\text{O}$  minus  $^{13}\text{C}=\text{O}$ ) IR spectra of the OAT2 acyl-enzyme complex produced by reaction with *N*- $\alpha$ -acetyl-L-glutamate. The broad absorption band at  $1690\text{-}1710\text{cm}^{-1}$  is assigned as the acyl-enzyme complex of OAT2.

**Supp Figure 6:** Kinetic analysis of the OAT2 reaction with *N*- $\alpha$ -acetyl-L-glutamate as measured by IR, indicating the steady state nature of the acyl-enzyme complex (upto 1700 sec). The plot was generated by GEPASI {Mendes, 1997 #527}. Experimental values of initial substrate [S] and enzyme [e] concentration along with the acyl-enzyme degradation time course [ea] were inputted into GEPASI which generated the curves for product formation [p] and enzyme regeneration [e]. The inset shows the mechanistic model employed.

**Supp Figure 7:** R.m.s.d values for  $\alpha$ -helix and  $\beta$ -sheet regions of acyl-OAT2 compared to the crystallographic coordinates for the three molecules, AB, CD and GH over an molecular dynamics simulation of 4 ns.
